# Supplementary material
Source: HighWire-hosted journal article supplement (https://injuryprevention.bmj.com/content/30/3/256)
Supplement: inline-supplementary-material-2 [file inline-supplementary-material-2.pdf]

**Table 2: Data Availability and Quality by State and ACEs Question**

| State          | ACEs questions included in 2019- 2020 BRFSS surveys                                  | BRFSS respondents who received ACEs questions: % of respondents who skipped the question |                 |               |                     |                   |                |              |              |                          |                    |
|----------------|--------------------------------------------------------------------------------------|------------------------------------------------------------------------------------------|-----------------|---------------|---------------------|-------------------|----------------|--------------|--------------|--------------------------|--------------------|
|                |                                                                                      | Mental illness                                                                           | Substance abuse | Incarceration | Parental separation | Domestic violence | Physical abuse | Verbal abuse | Sexual abuse | At least 1 ACEs question | All ACEs questions |
| Alabama        | yes; 2019 and 2020                                                                   | 16.41                                                                                    | 15.95           | 16.09         | 16.39               | 17.50             | 16.90          | 17.24        | 16.80        | 20.32                    | 15.76              |
| Alaska         | no                                                                                   |                                                                                          |                 |               |                     |                   |                |              |              |                          |                    |
| Arizona        | yes; 2020                                                                            | 20.91                                                                                    | 20.33           | 20.63         | 21.13               | 22.15             | 21.80          | 22.06        | 21.52        | 25.35                    | 20.08              |
| Arkansas       | no                                                                                   |                                                                                          |                 |               |                     |                   |                |              |              |                          |                    |
| California     | yes; 2020 (survey split 2; 21.8% of all BRFSS respondents)                           | 16.81                                                                                    | 16.16           | 16.38         | 16.32               | 17.57             | 16.81          | 17.08        | 16.70        | 19.47                    | 16.05              |
| Colorado       | no                                                                                   |                                                                                          |                 |               |                     |                   |                |              |              |                          |                    |
| Connecticut    | no                                                                                   |                                                                                          |                 |               |                     |                   |                |              |              |                          |                    |
| Delaware       | yes; 2019                                                                            | 19.94                                                                                    | 19.48           | 19.66         | 19.99               | 20.89             | 20.96          | 21.50        | 20.09        | 24.63                    | 19.14              |
| DC             | yes; 2020                                                                            | 20.62                                                                                    | 19.69           | 19.92         | 20.39               | 21.94             | 21.10          | 21.47        | 20.77        | 25.23                    | 19.52              |
| Florida        | yes; 2019 and 2020                                                                   | 25.93                                                                                    | 25.39           | 25.70         | 26.27               | 27.38             | 26.78          | 27.24        | 26.38        | 30.86                    | 25.17              |
| Georgia        | yes; 2020                                                                            | 22.89                                                                                    | 22.42           | 22.73         | 23.19               | 24.32             | 23.72          | 24.06        | 23.48        | 27.45                    | 22.21              |
| Hawaii         | yes; 2020                                                                            | 10.65                                                                                    | 10.27           | 10.43         | 10.61               | 12.17             | 11.41          | 11.84        | 10.96        | 14.53                    | 10.06              |
| Idaho          | yes; 2020                                                                            | 16.00                                                                                    | 15.10           | 15.50         | 15.69               | 16.99             | 16.34          | 17.09        | 16.20        | 21.07                    | 14.78              |
| Illinois       | no                                                                                   |                                                                                          |                 |               |                     |                   |                |              |              |                          |                    |
| Indiana        | yes; 2019                                                                            | 16.52                                                                                    | 15.93           | 16.15         | 16.88               | 17.42             | 16.55          | 17.56        | 16.89        | 21.32                    | 15.74              |
| Iowa           | yes; 2019 and 2020                                                                   | 15.95                                                                                    | 15.42           | 15.61         | 15.79               | 16.73             | 16.92          | 16.94        | 15.98        | 19.83                    | 15.24              |
| Kansas         | yes; 2019 (survey split 2; 25.0% of all BRFSS responders) and 2020 (split 2; 24.4%)  | 13.45                                                                                    | 12.57           | 12.86         | 12.94               | 14.14             | 13.71          | 14.38        | 13.34        | 17.84                    | 12.34              |
| Kentucky       | yes; 2020                                                                            | 16.40                                                                                    | 15.81           | 16.19         | 16.52               | 17.46             | 16.88          | 17.87        | 17.18        | 21.17                    | 15.68              |
| Louisiana      | no                                                                                   |                                                                                          |                 |               |                     |                   |                |              |              |                          |                    |
| Maine          | no                                                                                   |                                                                                          |                 |               |                     |                   |                |              |              |                          |                    |
| Maryland       | yes; 2020 (survey split 3; 19.9% of all BRFSS respondents)                           | 17.52                                                                                    | 17.05           | 17.30         | 17.77               | 18.64             | 17.88          | 18.52        | 17.88        | 21.63                    | 16.85              |
| Massachusetts  | yes; 2020 (survey split 1; 24.4% of all BRFSS respondents)                           | 21.08                                                                                    | 20.60           | 20.60         | 20.99               | 21.84             | 21.51          | 22.11        | 21.93        | 25.83                    | 19.93              |
| Michigan       | yes; 2019                                                                            | 10.52                                                                                    | 9.91            | 10.24         | 10.31               | 11.44             | 11.11          | 12.16        | 10.95        | 15.38                    | 9.75               |
| Minnesota      | no                                                                                   |                                                                                          |                 |               |                     |                   |                |              |              |                          |                    |
| Mississippi    | yes; 2019 and 2020                                                                   | 9.33                                                                                     | 8.44            | 8.65          | 9.14                | 10.64             | 9.64           | 10.00        | 9.16         | 14.28                    | 8.19               |
| Missouri       | yes; 2019 and 2020                                                                   | 13.43                                                                                    | 12.85           | 13.10         | 13.29               | 14.48             | 13.89          | 14.45        | 13.69        | 17.56                    | 12.71              |
| Montana        | yes; 2020                                                                            | 11.12                                                                                    | 10.17           | 10.47         | 10.78               | 11.89             | 11.21          | 12.02        | 10.77        | 15.90                    | 9.93               |
| Nebraska       | no                                                                                   |                                                                                          |                 |               |                     |                   |                |              |              |                          |                    |
| Nevada         | yes; 2020                                                                            | 28.59                                                                                    | 27.82           | 27.94         | 28.19               | 29.48             | 29.07          | 29.48        | 28.91        | 33.10                    | 27.5               |
| New Hampshire  | no                                                                                   |                                                                                          |                 |               |                     |                   |                |              |              |                          |                    |
| New Jersey     | yes; 2020 (survey split 2; 19.5% of all BRFSS respondents)                           | 21.20                                                                                    | 20.41           | 20.78         | 21.42               | 22.88             | 22.80          | 23.09        | 21.89        | 27.47                    | 20.06              |
| New Mexico     | yes; 2019                                                                            | 13.79                                                                                    | 13.00           | 13.24         | 13.47               | 14.36             | 14.06          | 14.34        | 13.71        | 17.14                    | 12.94              |
| New York       | yes; 2019 (survey split 3; 16.9% of all BRFSS respondents)                           | 18.60                                                                                    | 17.92           | 18.22         | 18.96               | 20.19             | 19.64          | 20.14        | 18.79        | 24.44                    | 17.69              |
| North Carolina | no                                                                                   |                                                                                          |                 |               |                     |                   |                |              |              |                          |                    |
| North Dakota   | yes; 2019 and 2020                                                                   | 9.39                                                                                     | 8.94            | 9.03          | 9.18                | 10.42             | 10.02          | 10.60        | 9.77         | 13.50                    | 8.82               |
| Ohio           | yes; 2019 (survey split 1; 34.1% of all BRFSS respondents)                           | 14.59                                                                                    | 14.00           | 14.12         | 14.7                | 15.82             | 15.14          | 15.87        | 14.94        | 19.19                    | 13.85              |
| Oklahoma       | yes; 2019 (survey split 2; 23.8% of all BRFSS respondents) and 2020 (split 2; 25.4%) | 15.93                                                                                    | 15.04           | 15.53         | 15.66               | 17.23             | 16.28          | 16.94        | 16.06        | 20.82                    | 14.77              |
| Oregon         | no                                                                                   |                                                                                          |                 |               |                     |                   |                |              |              |                          |                    |
| Pennsylvania   | yes; 2019                                                                            | 17.35                                                                                    | 16.70           | 16.88         | 17.12               | 18.01             | 17.70          | 18.00        | 17.45        | 21.00                    | 16.64              |
| Rhode Island   | yes; 2019 and 2020                                                                   | 17.84                                                                                    | 17.20           | 17.46         | 17.67               | 18.76             | 18.41          | 18.88        | 18.07        | 21.95                    | 16.96              |
| South Carolina | yes; 2019 and 2020                                                                   | 17.54                                                                                    | 16.77           | 17.05         | 17.53               | 18.71             | 17.92          | 18.45        | 15.45        | 22.28                    | 16.63              |
| South Dakota   | yes; 2020                                                                            | 14.18                                                                                    | 13.45           | 13.63         | 14.34               | 15.22             | 14.92          | 15.67        | 17.47        | 19.43                    | 13.11              |
| Tennessee      | yes; 2019                                                                            | 23.55                                                                                    | 22.91           | 23.28         | 23.61               | 24.51             | 24.34          | 24.64        | 23.87        | 27.78                    | 22.8               |
| Texas          | yes; 2020                                                                            | 26.38                                                                                    | 25.62           | 25.90         | 26.6                | 27.36             | 27.05          | 27.26        | 26.50        | 31.14                    | 25.27              |
| Utah           | yes; 2020                                                                            | 13.16                                                                                    | 12.28           | 12.53         | 12.61               | 13.26             | 13.08          | 13.48        | 12.76        | 16.17                    | 12.07              |
| Vermont        | no                                                                                   |                                                                                          |                 |               |                     |                   |                |              |              |                          |                    |
| Virginia       | yes; 2019 and 2020                                                                   | 19.61                                                                                    | 19.06           | 19.33         | 19.72               | 20.89             | 20.37          | 20.81        | 19.99        | 24.16                    | 18.89              |
| Washington     | no                                                                                   |                                                                                          |                 |               |                     |                   |                |              |              |                          |                    |
| West Virginia  | yes; 2019                                                                            | 10.88                                                                                    | 10.00           | 10.24         | 10.26               | 11.68             | 11.02          | 11.68        | 10.68        | 14.68                    | 9.98               |
| Wisconsin      | yes; 2019 and 2020                                                                   | 17.29                                                                                    | 16.58           | 16.92         | 17.7                | 18.08             | 18.49          | 18.76        | 17.21        | 23.13                    | 16.36              |
| Wyoming        | yes; 2020                                                                            | 13.62                                                                                    | 13.06           | 13.37         | 13.68               | 14.81             | 15.12          | 15.37        | 14.04        | 19.22                    | 12.79              |
